# Supplementary figures and images for: Genetic Diversity of Epichloë Endophytes Associated with Brachypodium and Calamagrostis Host Grass Genera including Two New Species
Source: MDPI journal article supplement (doi:10.3390/jof8101086), 2022-10-15

**Suppl. S3.** Principal Coordinates (PCoA) of isolates from *B. pinnatum* and *B. phoenicoides*

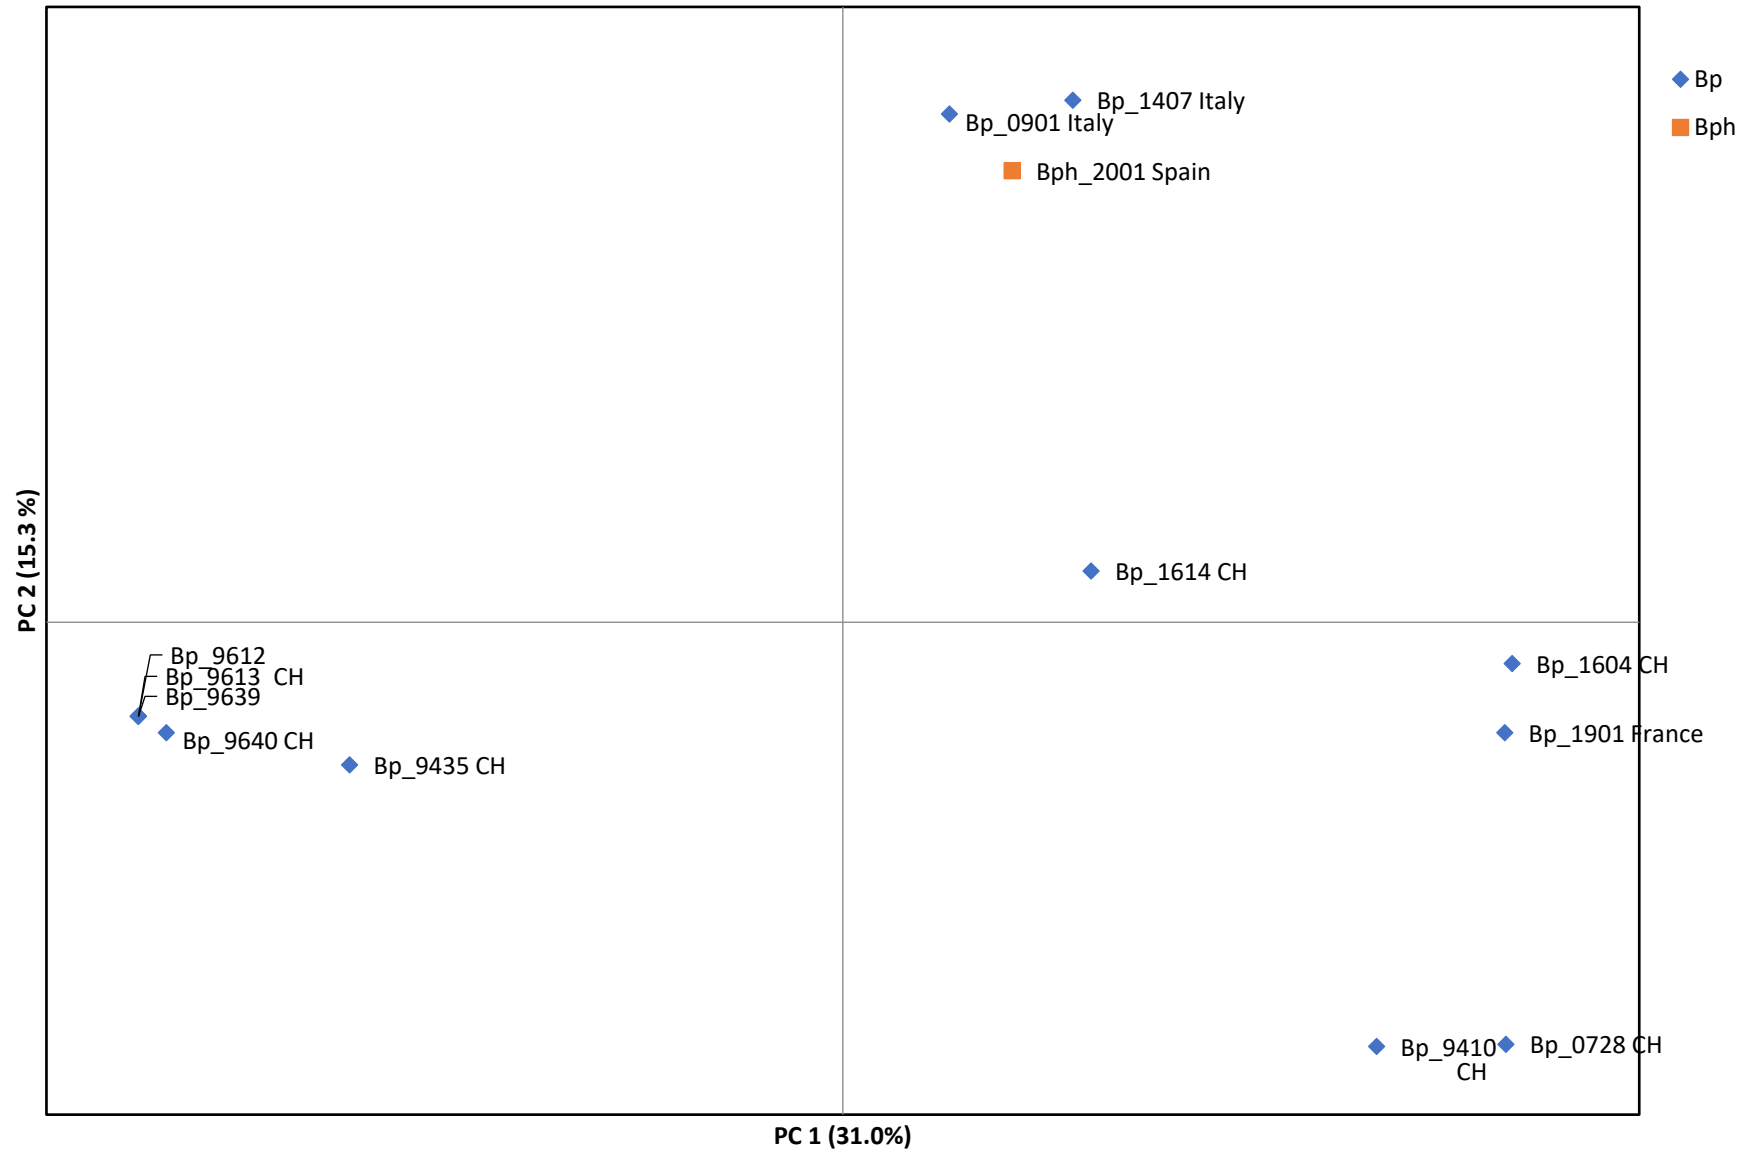

Supplement: s1 [file s1]

Suppl. S2. Principal Coordinates (PCoA) of asexual isolates from *B. sylvaticum*

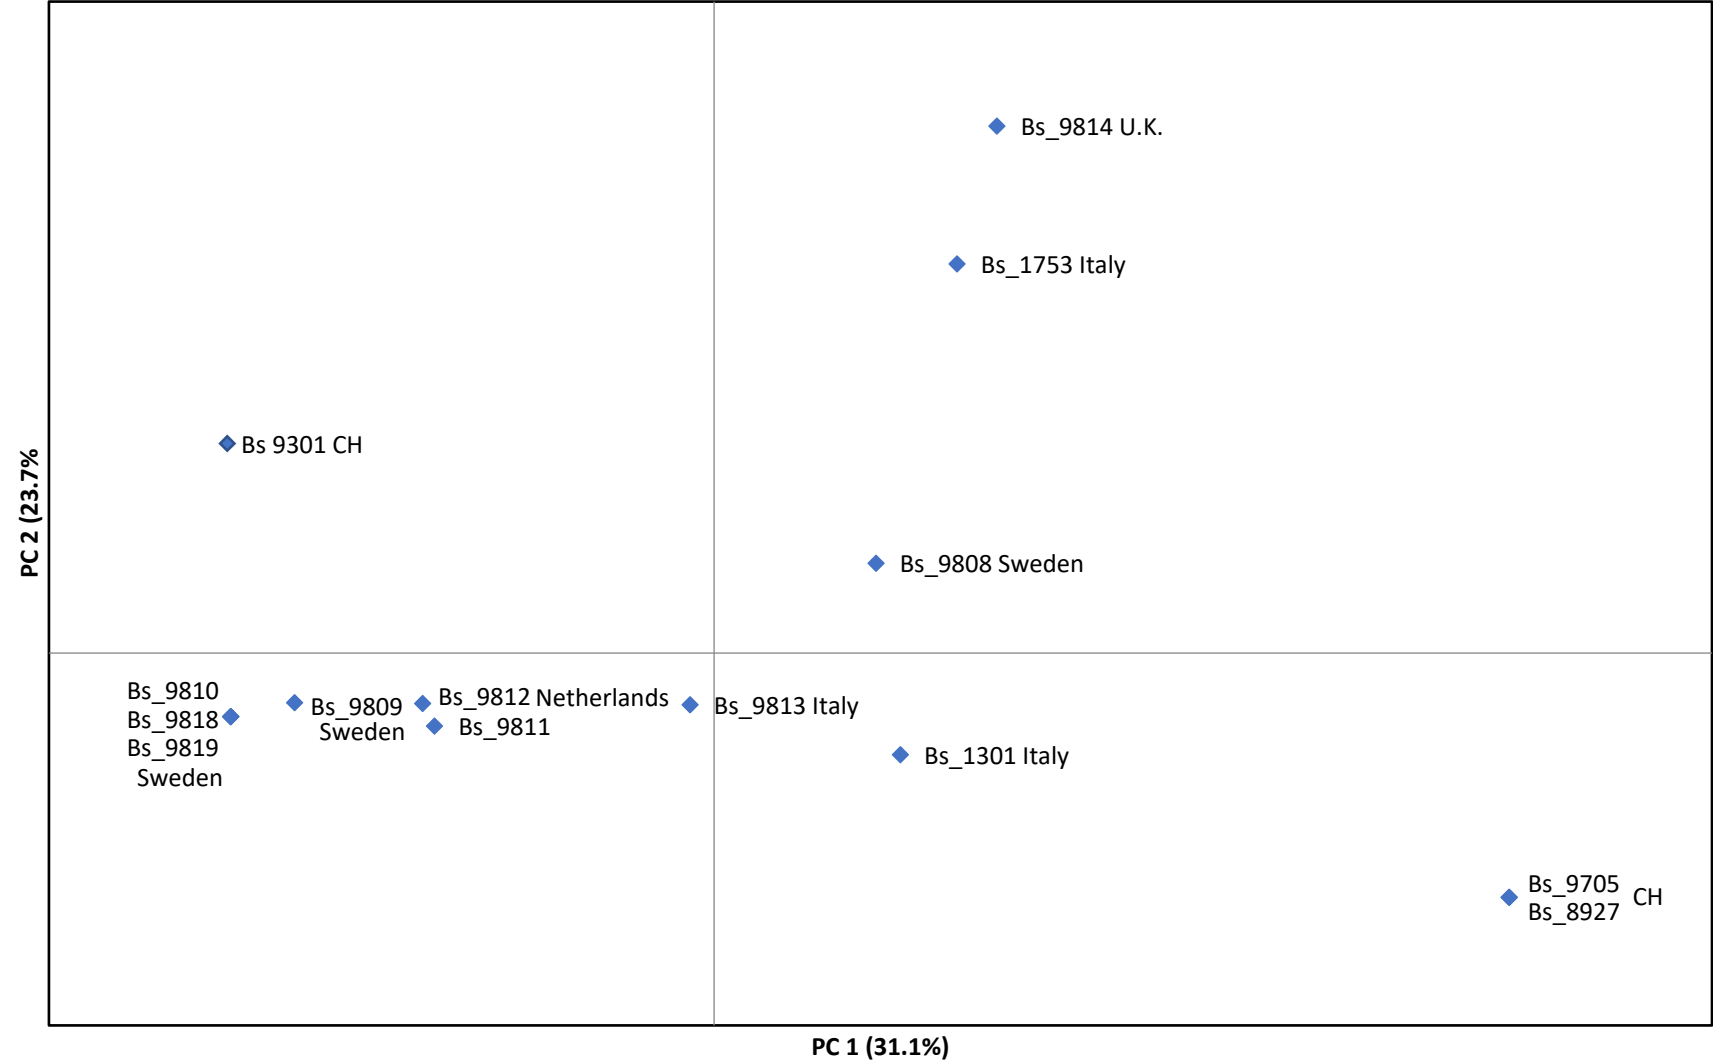

Supplement: s1 [file s1]
